# Supplementary material
Source: PubMed Central journal article supplement (PMC7510953)
Supplement: ehp6470.s001.acco.pdf [file ehp6470.s001.acco.pdf]

**Note to readers with disabilities:** *EHP* strives to ensure that all journal content is accessible to all readers. However, some figures and Supplemental Material published in *EHP* articles may not conform to [508 standards](#) due to the complexity of the information being presented. If you need assistance accessing journal content, please contact [ehp508@niehs.nih.gov](mailto:ehp508@niehs.nih.gov). Our staff will work with you to assess and meet your accessibility needs within 3 working days.

### **Supplemental Material**

#### **Chemical Characterization of a Legacy Aqueous Film-Forming Foam Sample and Developmental Toxicity in Zebrafish (*Danio rerio*)**

Kate M. Annunziato, Jeffery Doherty, Jonghwa Lee, John M. Clark, Wenle Liang, Christopher W. Clark, Malina Nguyen, Monika A. Roy, and Alicia R. Timme-Laragy

#### **Table of Contents**

**Table S1.** Unidentified fluorinated compounds detected in the aqueous film-forming foam (AFFF) sample by Orbitrap-HRMS with relative intensity percent values greater or equal to 0.1% of the total perfluorooctanesulfonic acid (PFOS) area.

**Table S2.** Summary of percentages of fragmented and normal pancreatic beta cell islets observed in 96 hours post fertilization (hpf) *Tg(ins:GFP)* larvae exposed to aqueous film-forming foam (AFFF).

**Figure S1.** Swim bladder inflation in 120 hours post fertilization (hpf) larvae following developmental exposure to aqueous film-forming foam (AFFF). N = 6 vials, each containing 6-10 larvae. Average percent inflation determined for each vial.

**Figure S2.** Representative images of 96 hours post fertilization (hpf) larvae exposed to 0 - 40.91 mg/L perfluorooctanesulfonic acid: perfluorohexanesulfonic acid PFOS:PFHxS mixture, 0 - 22.5 mg/L PFHxS and 0-35.28 mg/L PFOS.

**Figure S3.** . Representative images of 96 hours post fertilization (hpf) larvae exposed to 0 - 4 mg/L sodium dodecyl sulfate and 0 - 0.5 mg/L sodium tetradecyl sulfate.

Table S1. Unidentified fluorinated compounds detected in the aqueous film-forming foam (AFFF) sample by Orbitrap-HRMS with relative intensity percent values greater or equal to 0.1% of the total perfluorooctanesulfonic acid (PFOS) area.

|    | Name                                                                              | Formula                | Molecular Weight | RT (min) | Area     | Relative intensity (%) based on the PFOS area | Relative intensity (%) based on the area sum |
|----|-----------------------------------------------------------------------------------|------------------------|------------------|----------|----------|-----------------------------------------------|----------------------------------------------|
| 1  |                                                                                   | C6 H F13 O3 S          | 399.9435         | 6.48     | 12874456 | 14.6                                          | 8.1                                          |
| 2  |                                                                                   | C13 H20 F5 N9 O4 P2 S2 | 587.0473         | 6.78     | 5254931  | 6.0                                           | 3.3                                          |
| 3  |                                                                                   | C5 H F11 O3 S          | 349.9468         | 6.17     | 2378510  | 2.7                                           | 1.5                                          |
| 4  |                                                                                   | C17 H37 F P2 S         | 354.2076         | 8.21     | 2350105  | 2.7                                           | 1.5                                          |
| 5  |                                                                                   | C16 H32 F2 N4 O6       | 414.2288         | 7.28     | 2111143  | 2.4                                           | 1.3                                          |
| 6  |                                                                                   | C12 H16 F10 N8 O5 S2   | 606.0528         | 6.03     | 2048981  | 2.3                                           | 1.3                                          |
| 7  |                                                                                   | C7 H F15 O3 S          | 449.9406         | 6.83     | 1961854  | 2.2                                           | 1.2                                          |
| 8  | Similar to: 3-(4-Methoxyphenyl)-N-(1-naphthyl)-3-(propylamino)-2-propenethioamide | C14 H29 F2 N2 O P S    | 342.1713         | 6.43     | 1887928  | 2.1                                           | 1.2                                          |
| 9  |                                                                                   | C6 H F13 O3 S          | 399.9435         | 6.42     | 1802043  | 2.0                                           | 1.1                                          |
| 10 |                                                                                   | C14 H24 F9 N5 O8 P2 S2 | 687.0400         | 7.55     | 1771504  | 2.0                                           | 1.1                                          |
| 11 | Similar to: 4-Dodecylbenzenesulfonic acid                                         | C14 H29 F O4 S         | 312.1762         | 7.63     | 1727805  | 2.0                                           | 1.1                                          |
| 12 |                                                                                   | C12 H14 F4 N10 O P2 S  | 484.0488         | 6.27     | 1648276  | 1.9                                           | 1.0                                          |
| 13 |                                                                                   | C3 H4 F O10 P          | 249.9534         | 5.26     | 1533768  | 1.7                                           | 1.0                                          |
| 14 |                                                                                   | C16 H26 F9 N6 O8 P S3  | 728.0567         | 5.89     | 1443969  | 1.6                                           | 0.9                                          |
| 15 |                                                                                   | C4 H F9 O3 S           | 299.9503         | 5.69     | 1343110  | 1.5                                           | 0.8                                          |
| 16 |                                                                                   | C15 H10 F14 N6 O       | 556.0695         | 5.97     | 1247397  | 1.4                                           | 0.8                                          |
| 17 |                                                                                   | C15 H16 F3 N9 O10 S2   | 603.0417         | 6.22     | 1123615  | 1.3                                           | 0.7                                          |
| 18 |                                                                                   | C17 H36 F N2 O7 P      | 430.2244         | 6.58     | 987977   | 1.1                                           | 0.6                                          |
| 19 |                                                                                   | C20 H47 F2 N8 P3       | 530.3120         | 8.90     | 904015   | 1.0                                           | 0.6                                          |
| 20 |                                                                                   | C12 H21 F9 N2 O3 P2 S  | 506.0599         | 5.49     | 873468   | 1.0                                           | 0.6                                          |

|    | Name                                      | Formula                 | Molecular Weight | RT (min) | Area   | Relative intensity (%) based on the PFOS area | Relative intensity (%) based on the area sum |
|----|-------------------------------------------|-------------------------|------------------|----------|--------|-----------------------------------------------|----------------------------------------------|
| 21 |                                           | C21 H34 F3 N2 O2 P S2   | 498.1750         | 6.55     | 868974 | 1.0                                           | 0.5                                          |
| 22 |                                           | C16 H28 F10 N2 O2 P2 S3 | 628.0631         | 5.36     | 805730 | 0.9                                           | 0.5                                          |
| 23 |                                           | C12 H19 F9 N7 O13 P S   | 703.0356         | 6.79     | 779274 | 0.9                                           | 0.5                                          |
| 24 |                                           | C13 H10 F10 N6 O        | 456.0766         | 5.45     | 771289 | 0.9                                           | 0.5                                          |
| 25 |                                           | C20 H40 F5 N10 P        | 546.3077         | 7.51     | 697598 | 0.8                                           | 0.4                                          |
| 26 |                                           | C22 H51 F2 N8 O P3      | 574.3391         | 8.98     | 649004 | 0.7                                           | 0.4                                          |
| 27 |                                           | C9 H22 F N2 O2 P3 S     | 334.0585         | 5.30     | 638464 | 0.7                                           | 0.4                                          |
| 28 |                                           | C15 H28 F2 O5           | 326.1916         | 8.16     | 615004 | 0.7                                           | 0.4                                          |
| 29 | 4-Bromo-2-fluorobiphenyl                  | C12 H8 Br F             | 249.9803         | 0.03     | 548003 | 0.6                                           | 0.3                                          |
| 30 |                                           | C18 H45 F N10 O2 P2     | 514.3177         | 6.63     | 508834 | 0.6                                           | 0.3                                          |
| 31 |                                           | C11 H16 F3 N10 O P S2   | 456.0625         | 5.12     | 498489 | 0.6                                           | 0.3                                          |
| 32 |                                           | C12 H23 F6 N10 P3 S2    | 578.0669         | 5.06     | 495020 | 0.6                                           | 0.3                                          |
| 33 |                                           | C18 H43 F2 N8 O P3      | 518.2761         | 6.67     | 492092 | 0.6                                           | 0.3                                          |
| 34 |                                           | C8 H F15 O2             | 413.9738         | 6.38     | 448748 | 0.5                                           | 0.3                                          |
| 35 |                                           | C22 H44 F5 N10 O P      | 590.3341         | 7.54     | 443525 | 0.5                                           | 0.3                                          |
| 36 |                                           | C24 H55 F2 N8 O2 P3     | 618.3653         | 9.03     | 427560 | 0.5                                           | 0.3                                          |
| 37 |                                           | C9 H F19 O3 S           | 549.9357         | 7.46     | 426706 | 0.5                                           | 0.3                                          |
| 38 |                                           | C7 H8 F9 N10 P          | 434.0520         | 5.99     | 418571 | 0.5                                           | 0.3                                          |
| 39 |                                           | C6 H7 F5 N6 O16 P2 S    | 607.9035         | 8.00     | 414410 | 0.5                                           | 0.3                                          |
| 40 |                                           | C15 H22 F14 N6 P2 S2    | 678.0600         | 5.61     | 413429 | 0.5                                           | 0.3                                          |
| 41 | Similar to: Perfluorodecanoic acid (PFDA) | C2 H7 F3 N4 O4 P2       | 269.9904         | 5.67     | 411938 | 0.5                                           | 0.3                                          |
| 42 |                                           | C8 H19 F6 N6 P3         | 406.0799         | 5.15     | 396114 | 0.4                                           | 0.2                                          |
| 43 |                                           | C7 H F15 O3 S           | 449.9406         | 6.75     | 393516 | 0.4                                           | 0.2                                          |

|    | Name                                         | Formula                 | Molecular Weight | RT (min) | Area   | Relative intensity (%) based on the PFOS area | Relative intensity (%) based on the area sum |
|----|----------------------------------------------|-------------------------|------------------|----------|--------|-----------------------------------------------|----------------------------------------------|
| 44 |                                              | C17 H24 F16 N6 P2 S     | 710.1001         | 6.10     | 389075 | 0.4                                           | 0.2                                          |
| 45 |                                              | C8 H6 Cl F11 N2 O3 P2 S | 515.9087         | 7.16     | 379704 | 0.4                                           | 0.2                                          |
| 46 | Similar to:<br>Perfluorooctanoic acid (PFOA) | C5 H3 F7 N8 P2          | 369.9841         | 6.38     | 362842 | 0.4                                           | 0.2                                          |
| 47 |                                              | C14 H25 F8 N10 P3 S     | 610.1071         | 5.58     | 362577 | 0.4                                           | 0.2                                          |
| 48 |                                              | C22 H51 F2 N8 P3        | 558.3440         | 6.90     | 355867 | 0.4                                           | 0.2                                          |
| 49 |                                              | C11 H13 F13 N2 O2 S     | 484.0488         | 5.98     | 350772 | 0.4                                           | 0.2                                          |
| 50 |                                              | C20 H40 F5 N10 O P      | 562.3028         | 6.70     | 338722 | 0.4                                           | 0.2                                          |
| 51 |                                              | C7 H13 F5 N8 O S2       | 384.0556         | 5.68     | 321652 | 0.4                                           | 0.2                                          |
| 52 |                                              | C24 H57 F N10 O6 P2     | 662.3916         | 9.07     | 289465 | 0.3                                           | 0.2                                          |
| 53 |                                              | C24 H48 F5 N10 P        | 602.3710         | 7.03     | 289136 | 0.3                                           | 0.2                                          |
| 54 |                                              | C9 H17 F13 N10 O S      | 560.1099         | 5.28     | 288418 | 0.3                                           | 0.2                                          |
| 55 |                                              | C6 H18 F3 N8 P3 S       | 384.0556         | 5.45     | 266850 | 0.3                                           | 0.2                                          |
| 56 |                                              | C7 H6 F3 N2 O16 P       | 461.9411         | 6.92     | 263218 | 0.3                                           | 0.2                                          |
| 57 |                                              | C23 H51 F7 N8 P2        | 634.3602         | 7.56     | 255918 | 0.3                                           | 0.2                                          |
| 58 |                                              | C6 H2 F13 N O2 S        | 398.9603         | 6.68     | 237690 | 0.3                                           | 0.1                                          |
| 59 |                                              | C16 H41 F N10 O P2      | 470.2917         | 6.23     | 229796 | 0.3                                           | 0.1                                          |
| 60 |                                              | C44 H88 F O3 P S        | 746.6177         | 9.93     | 227319 | 0.3                                           | 0.1                                          |
| 61 |                                              | C10 H17 F10 N3 O5 P2    | 511.0488         | 6.93     | 213307 | 0.2                                           | 0.1                                          |
| 62 |                                              | C42 H80 F4 N6 O         | 760.6331         | 9.93     | 207806 | 0.2                                           | 0.1                                          |
| 63 | 1H-Perfluorohexane                           | C6 H F13                | 319.9874         | 6.06     | 201751 | 0.2                                           | 0.1                                          |
| 64 |                                              | C5 H5 F11 N2 O5 P2      | 443.9504         | 6.76     | 194308 | 0.2                                           | 0.1                                          |

|    | Name                                                   | Formula                | Molecular Weight | RT (min) | Area   | Relative intensity (%) based on the PFOS area | Relative intensity (%) based on the area sum |
|----|--------------------------------------------------------|------------------------|------------------|----------|--------|-----------------------------------------------|----------------------------------------------|
| 65 |                                                        | C21 H47 F7 N8 P2       | 606.3290         | 6.72     | 192686 | 0.2                                           | 0.1                                          |
| 66 |                                                        | C17 H24 F16 N6 P2 S    | 710.1001         | 6.01     | 191339 | 0.2                                           | 0.1                                          |
| 67 |                                                        | C6 H7 F9 N6            | 334.0585         | 5.12     | 189199 | 0.2                                           | 0.1                                          |
| 68 |                                                        | C6 H7 F5 N6 O16 P2 S   | 607.9035         | 7.78     | 183897 | 0.2                                           | 0.1                                          |
| 69 |                                                        | C12 H20 F7 N10 O6 P S  | 596.0918         | 5.58     | 176314 | 0.2                                           | 0.1                                          |
| 70 |                                                        | C5 H13 F4 N4 O7 P      | 348.0454         | 5.50     | 164132 | 0.2                                           | 0.1                                          |
| 71 |                                                        | C4 H6 F6 N4 O12 P2     | 477.9361         | 6.95     | 155919 | 0.2                                           | 0.1                                          |
| 72 | Similar to: 4-tert-Butylcalix[4]arene tetraacetic acid | C26 H61 F N10 O7 P2    | 706.4174         | 9.11     | 153157 | 0.2                                           | 0.1                                          |
| 73 | 1,1,2,2-Tetrafluoro-2-hydroxyethanesulfonyl fluoride   | C2 H F5 O3 S           | 199.9567         | 3.61     | 153155 | 0.2                                           | 0.1                                          |
| 74 |                                                        | C44 H83 F7 O           | 760.6331         | 7.47     | 148283 | 0.2                                           | 0.1                                          |
| 75 |                                                        | C32 H71 F4 N8 O4 P     | 738.5261         | 5.01     | 145664 | 0.2                                           | 0.1                                          |
| 76 |                                                        | C24 H51 F8 N10 O P     | 678.3864         | 7.59     | 141418 | 0.2                                           | 0.1                                          |
| 77 |                                                        | C13 H14 F11 N10 O2 P   | 582.0862         | 6.52     | 138658 | 0.2                                           | 0.1                                          |
| 78 |                                                        | C2 H3 F2 N4 O2 P       | 183.9958         | 5.17     | 135267 | 0.2                                           | 0.1                                          |
| 79 |                                                        | C13 H29 F6 N8 O10 P3 S | 696.0846         | 6.10     | 129967 | 0.1                                           | 0.1                                          |
| 80 | Similar to: Perfluorooctanoic acid (PFOA)              | C5 H3 F7 N8 P2         | 369.9841         | 6.28     | 123226 | 0.1                                           | 0.1                                          |
| 81 |                                                        | C8 H19 F N P S         | 211.0958         | 6.03     | 120863 | 0.1                                           | 0.1                                          |
| 82 | 3,3,3-Trifluoropropanoic acid                          | C3 H3 F3 O2            | 128.0083         | 0.85     | 120383 | 0.1                                           | 0.1                                          |
| 83 |                                                        | C3 H3 F10 N4 O3 P      | 363.9771         | 6.06     | 117503 | 0.1                                           | 0.1                                          |
| 84 |                                                        | C7 H3 F12 N4 O3 P S    | 481.9476         | 6.98     | 116061 | 0.1                                           | 0.1                                          |

|     | Name                                                                     | Formula                | Molecular Weight | RT (min) | Area   | Relative intensity (%) based on the PFOS area | Relative intensity (%) based on the area sum |
|-----|--------------------------------------------------------------------------|------------------------|------------------|----------|--------|-----------------------------------------------|----------------------------------------------|
| 85  |                                                                          | C13 H27 F O4 S         | 298.1605         | 7.30     | 115591 | 0.1                                           | 0.1                                          |
| 86  | 1,1,1,2,2,3,3,4,4-Nonafluorobutane                                       | C4 H F9                | 219.9935         | 5.30     | 113822 | 0.1                                           | 0.1                                          |
| 87  |                                                                          | C15 H34 F6 N10 O3      | 516.2720         | 4.80     | 113647 | 0.1                                           | 0.1                                          |
| 88  |                                                                          | C12 H18 F11 N8 P S     | 546.0943         | 5.28     | 113461 | 0.1                                           | 0.1                                          |
| 89  |                                                                          | C5 H F9 O2             | 263.9834         | 5.30     | 113445 | 0.1                                           | 0.1                                          |
| 90  |                                                                          | C14 H34 F5 N8 O2 P     | 472.2457         | 4.85     | 112589 | 0.1                                           | 0.1                                          |
| 91  |                                                                          | C22 H47 F8 N10 O P     | 650.3549         | 6.73     | 111345 | 0.1                                           | 0.1                                          |
| 92  |                                                                          | C10 H23 F8 N6 O P3     | 488.1032         | 5.54     | 111162 | 0.1                                           | 0.1                                          |
| 93  |                                                                          | C5 H12 F5 N5 O7 P2 S   | 442.9864         | 6.76     | 110960 | 0.1                                           | 0.1                                          |
| 94  |                                                                          | C9 H25 F N10 O S       | 340.1922         | 7.58     | 110013 | 0.1                                           | 0.1                                          |
| 95  |                                                                          | C6 H F11 O2            | 313.9800         | 5.66     | 109067 | 0.1                                           | 0.1                                          |
| 96  |                                                                          | C6 H8 F12 N9 O2 P      | 497.0346         | 6.94     | 108137 | 0.1                                           | 0.1                                          |
| 97  |                                                                          | C29 H57 F11 N7 O3 P3 S | 885.3278         | 6.01     | 107114 | 0.1                                           | 0.1                                          |
| 98  | Similar to: N-(3-(Dimethylamino) propyl) tridecafluorohexanesulphonamide | C8 H17 F9 N8 O6 S2     | 556.0565         | 5.78     | 103670 | 0.1                                           | 0.1                                          |
| 99  |                                                                          | C16 H33 F O4 S         | 340.2083         | 8.93     | 100956 | 0.1                                           | 0.1                                          |
| 100 |                                                                          | C10 H22 F N2 O2 P      | 252.1397         | 6.81     | 100429 | 0.1                                           | 0.1                                          |

RT = retention time

Table S2. Summary of percentages of fragmented and normal pancreatic beta cell islets observed in 96 hours post fertilization (hpf) *Tg(ins:GFP)* larvae exposed to aqueous film-forming foam (AFFF).

|        | <b>0% AFFF</b> |               | <b>2.20e-4% AFFF</b> |               | <b>4.40e-4% AFFF</b> |              |
|--------|----------------|---------------|----------------------|---------------|----------------------|--------------|
|        | Normal         | Fragmented    | Normal               | Fragmented    | Normal               | Fragmented   |
| Vial 1 | 83%<br>(5/6)   | 17%<br>(1/6)  | 57%<br>(4/7)         | 43%<br>(3/7)  | 50%<br>(3/6)         | 50%<br>(3/6) |
| Vial 2 | 67%<br>(4/6)   | 33%<br>(2/6)  | 40%<br>(4/10)        | 60%<br>(6/10) | 50%<br>(4/8)         | 50%<br>(4/8) |
| Vial 3 | 100%<br>(6/6)  | 0%<br>(6/6)   | 100%<br>(6/6)        | 0%<br>(0/6)   | 83%<br>(5/6)         | 17%<br>(1/6) |
| Vial 4 | 88%<br>(7/8)   | 13%<br>(1/8)  | 83%<br>(5/6)         | 17%<br>(1/6)  | 86%<br>(6/7)         | 14%<br>(1/7) |
| Vial 5 | 100%<br>(9/9)  | 0%<br>(0/9)   | 83%<br>(5/6)         | 17%<br>(5/6)  | 67%<br>(4/6)         | 33%<br>(2/6) |
| Vial 6 | 80%<br>(8/10)  | 20%<br>(2/10) | 71%<br>(5/7)         | 29%<br>(2/7)  | 50%<br>(3/6)         | 50%<br>(3/6) |
| MEAN   | 86%            | 14%           | 73%                  | 27%           | 64%                  | 36%          |

Each vial represents an experimental replicate containing 6-10 larvae. Parentheses contain number of either normal or fragmented islets out of the total number of GFP-positive larvae within each vial. Adult populations contained heterozygous and homozygous individuals, so some GFP-negative embryos were observed.

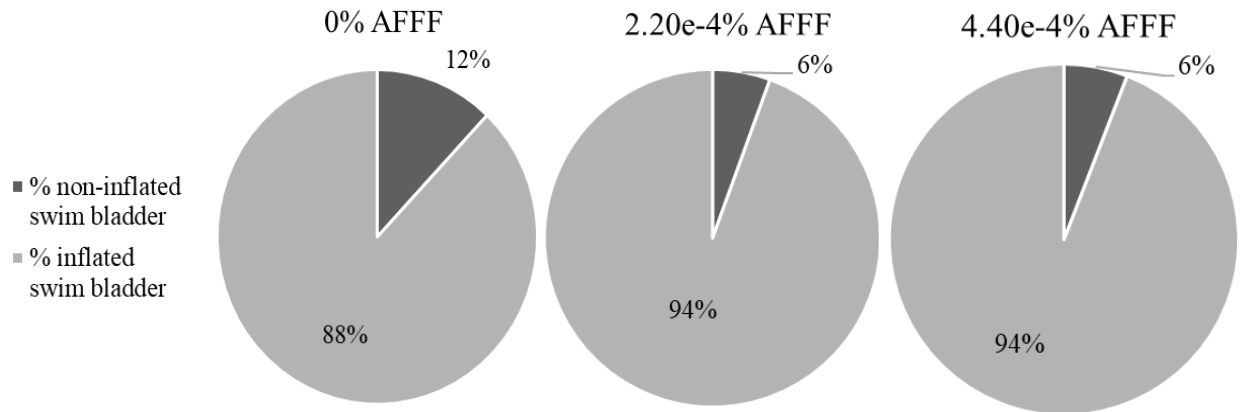

Figure S1. Swim bladder inflation in 120 hours post fertilization (hpf) larvae following developmental exposure to aqueous film-forming foam (AFFF). N = 6 vials, each containing 6-10 larvae. Average percent inflation determined for each vial.



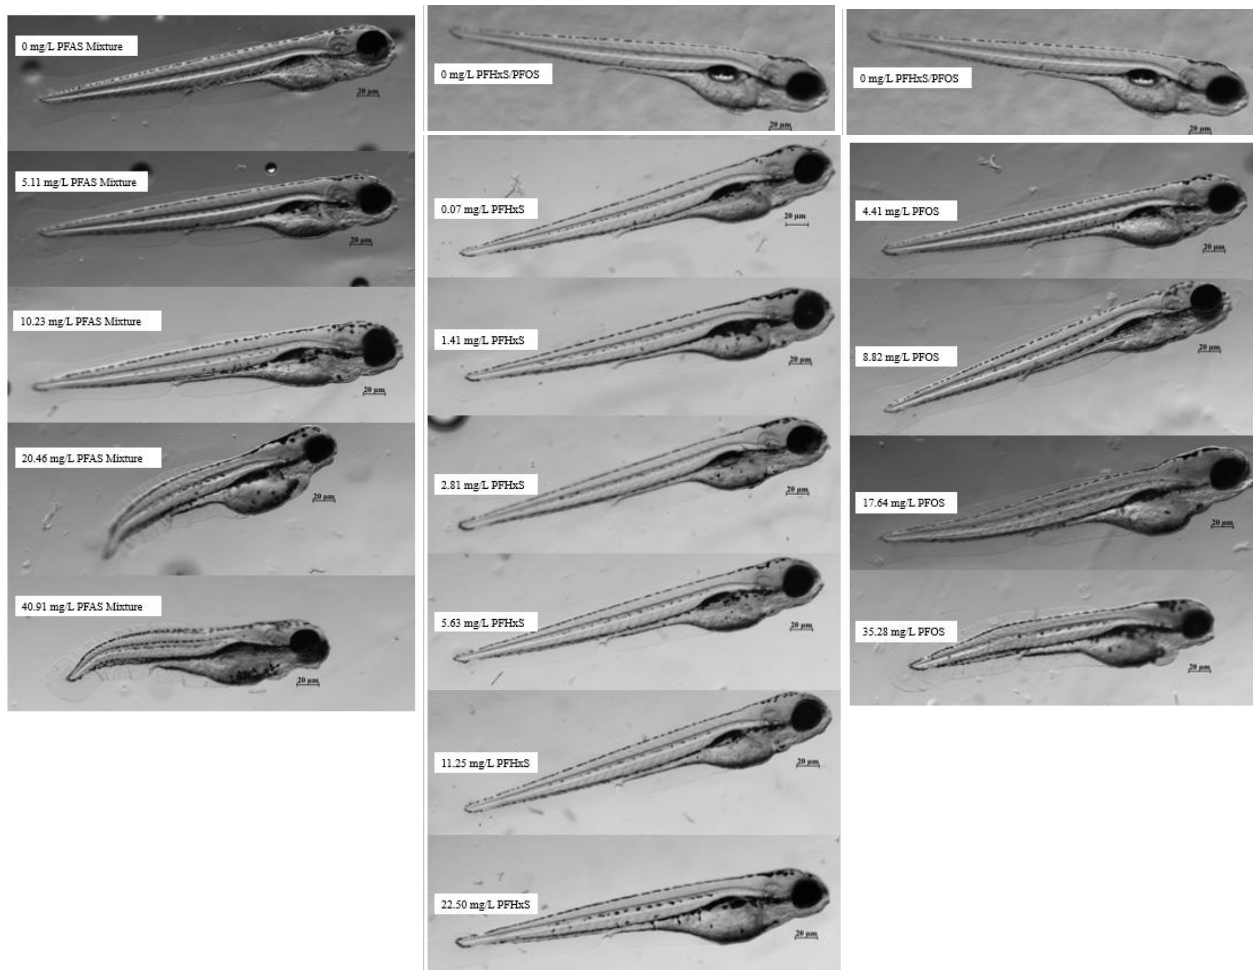

Figure S2. Representative images of 96 hours post fertilization (hpf) larvae exposed to 0 - 40.91 mg/L perfluorooctanesulfonic acid: perfluorohexanesulfonic acid PFOS:PFHxS mixture, 0 - 22.5 mg/L PFHxS and 0-35.28 mg/L PFOS.

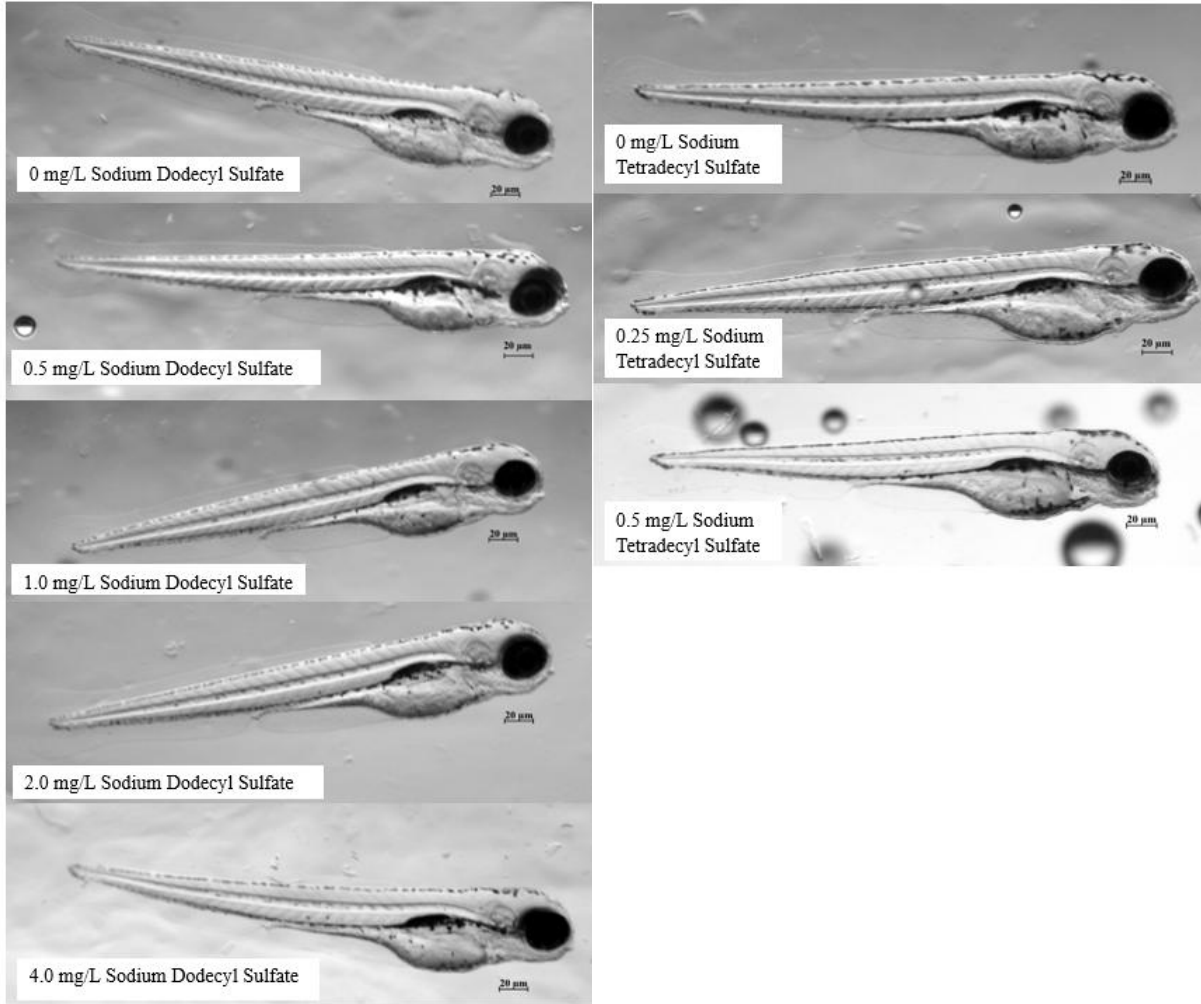

Figure S3. Representative images of 96 hours post fertilization (hpf) larvae exposed to 0 - 4 mg/L sodium dodecyl sulfate and 0 - 0.5 mg/L sodium tetradecyl sulfate.
