# Supplementary material
Source: PubMed Central journal article supplement (PMC7510953)
Supplement: ehp6470.smcontents.508.pdf [file ehp6470.smcontents.508.pdf]

**Note to readers with disabilities:** *EHP* strives to ensure that all journal content is accessible to all readers. However, some figures and Supplemental Material published in *EHP* articles may not conform to [508 standards](#) due to the complexity of the information being presented. If you need assistance accessing journal content, please contact [ehp508@niehs.nih.gov](mailto:ehp508@niehs.nih.gov). Our staff will work with you to assess and meet your accessibility needs within 3 working days.

### **Supplemental Material**

#### **Chemical Characterization of a Legacy Aqueous Film-Forming Foam Sample and Developmental Toxicity in Zebrafish (*Danio rerio*)**

Kate M. Annunziato, Jeffery Doherty, Jonghwa Lee, John M. Clark, Wenle Liang, Christopher W. Clark, Malina Nguyen, Monika A. Roy, and Alicia R. Timme-Laragy

#### **Table of Contents**

**Table S1.** Unidentified fluorinated compounds detected in the aqueous film-forming foam (AFFF) sample by Orbitrap-HRMS with relative intensity percent values greater or equal to 0.1% of the total perfluorooctanesulfonic acid (PFOS) area.

**Table S2.** Summary of percentages of fragmented and normal pancreatic beta cell islets observed in 96 hours post fertilization (hpf) *Tg(ins:GFP)* larvae exposed to aqueous film-forming foam (AFFF).

**Figure S1.** Swim bladder inflation in 120 hours post fertilization (hpf) larvae following developmental exposure to aqueous film-forming foam (AFFF). N = 6 vials, each containing 6-10 larvae. Average percent inflation determined for each vial.

**Figure S2.** Representative images of 96 hours post fertilization (hpf) larvae exposed to 0 - 40.91 mg/L perfluorooctanesulfonic acid: perfluorohexanesulfonic acid PFOS:PFHxS mixture, 0 - 22.5 mg/L PFHxS and 0-35.28 mg/L PFOS.

**Figure S3.** . Representative images of 96 hours post fertilization (hpf) larvae exposed to 0 - 4 mg/L sodium dodecyl sulfate and 0 - 0.5 mg/L sodium tetradecyl sulfate.
